1           **Investigation of skin microbiota reveals *Mycobacterium ulcerans-Aspergillus* sp. trans-**  
2                                           **kingdom communication**

3  
4  
5           Hammoudi N.<sup>1,2</sup>, Cassagne C<sup>3</sup>, Million M.<sup>2</sup>, Ranque S<sup>3</sup>, Kabore O.<sup>2</sup>,  
6                                           Drancourt M.<sup>2</sup>, Zingue D.<sup>2,4</sup> Bouam A.<sup>2\*</sup>

7  
8           1. IHU Méditerranée Infection, Marseille, France.

9           2. Aix Marseille Univ., IRD, MEPHI, IHU Méditerranée Infection, Marseille, France.

10          3. Aix Marseille Univ., IRD, AP-HM, SSA, VITROME, IHU Méditerranée Infection,  
11          Marseille, France.

12          4. Centre Muraz, Bobo-Dioulasso, Burkina Faso.

13  
14          \*Corresponding author: Amar BOUAM, DVM, PhD.

15          MEPHI, IHU Méditerranée Infection, Marseille, France

16          19-21 Bd Jean Moulin, 13385 Marseille Cedex 05, France

17          <mailto:amarbouam@yahoo.fr>

18          Phone number: +33 7 58 29 77 12

19

20

## 21 **ABSTRACT**

### 22 **Background**

23 *Mycobacterium ulcerans* secrete a series of non-ribosomal-encoded toxins known as mycolactones that  
24 are responsible for causing a disabling ulceration of the skin and subcutaneous tissues named Buruli  
25 ulcer. The disease is the sole non-contagion among the three most common mycobacterial diseases in  
26 humans. Direct contact with contaminated wetlands is a risk factor for Buruli ulcer, responsible for *M.*  
27 *ulcerans* skin carriage before transcutaneous inoculation with this opportunistic pathogen.

### 28 **Methodology and principal findings**

29 In this study, we analysed the bacterial and fungal skin microbiota in individuals exposed to *M. ulcerans*  
30 in Burkina Faso. We showed that *M. ulcerans*-specific DNA sequences were detected on the unbreached  
31 skin of 6/52 (11.5%) asymptomatic farmers living in Sindou versus 0/52 (0%) of those living in the non-  
32 endemic region of Tenkodogo. Then, we cultured the skin microbiota of asymptomatic *M. ulcerans*  
33 carriers and negative control individuals, all living in the region of Sindou. A total of 84 different  
34 bacterial and fungal species were isolated, 21 from *M. ulcerans*-negative skin samples, 31 from *M.*  
35 *ulcerans*-positive samples and 32 from both. More specifically, Actinobacteria, *Aspergillus niger* and  
36 *Aspergillus flavus* were significantly associated with *M. ulcerans* skin carriage. We further observed that  
37 *in vitro*, mycolactones induced spore germination of *A. flavus*, attracting the fungal network.

### 38 **Conclusion**

39 These unprecedented observations suggest that interactions with fungi may modulate the outcome of *M.*  
40 *ulcerans* skin carriage, opening new venues to the understanding of Buruli ulcer pathology, prophylaxis  
41 and treatment of this still neglected tropical infection.

42  
43 **Keywords:** *Aspergillus* spp., *Aspergillus niger*, *Aspergillus flavus*, Buruli ulcer, *Mycobacterium*  
44 *ulcerans*, skin microbiota, fungi, *Penicillium* spp., *Penicillium rubens*.

45 **Author summary**

46 Buruli ulcer is a chronic infectious disease caused by the environmental opportunistic pathogen  
47 *Mycobacterium ulcerans* which secretes an exotoxin responsible for its pathogenicity. The reservoir and  
48 sources of *M. ulcerans* in the environment remain elusive and its mode of transmission is unclear. To  
49 acquire *M. ulcerans* infection, at least two conditions must be met, viable bacteria and a skin lesion as  
50 demonstrated by experimental animal models. In this study, we showed that *M. ulcerans* specific DNA  
51 sequences could be detected on the healthy skin of asymptomatic farmers living in one region of Burkina  
52 Faso where Buruli ulcer cases had already been reported, but not in Buruli ulcer-free regions, suggesting  
53 skin carriage after contacts with environmental sources. We also investigated the skin microbiota of *M.*  
54 *ulcerans* carriers and found significant associations of some bacteria and fungi with skin carriage of *M.*  
55 *ulcerans*. These associations may due to the effect of mycolactones on some fungi species. As we  
56 showed previously with *Mucor circinelloides* and here with *Aspergillus flavus*.

## 57 **Introduction**

58 Buruli ulcer is a disabling chronic disease of the skin and the subcutaneous tissues [1].

59 The disease has been reported since 1948 in several tropical regions [2], with the highest incidence being

60 observed in West African countries, including Côte d'Ivoire, Ghana, and Benin [3]. The causative agent

61 *Mycobacterium ulcerans* is a non-tuberculous mycobacterium harbouring a 174-kb circular virulence

62 plasmid pMUM [4-5] encoding three genes, *mlsA1*, *mlsA2* and *mlsB*, responsible for the non-ribosomal

63 synthesis of mycolactone toxins, the main virulence factors of the pathogen [6]. This macrolide exotoxin

64 is secreted by a group of closely related non-tuberculous mycobacteria named Mycolactone Producing

65 Mycobacteria (MPM) [7-8]. Comparative analysis of whole genome sequences showed that MPM form a

66 single clonal group that evolved from a *Mycobacterium marinum* parent [9]. This group is divided into

67 three lineages, including frog and fish pathogens in one lineage [10-11], the Japanese strain *M. ulcerans*

68 subsp. *shinshuense* in a second lineage, while the third lineage includes a highly clonal group responsible

69 for Buruli ulcer in Africa and Australia [9]. Every strain synthesizes at least one of the eight congeners

70 of mycolactone A/B named mycolactone C, D, E, F, dia-F, S1 and S2 [12]. Each type of mycolactone

71 exhibits a variable degree of cytotoxicity, with mycolactone A/B being the most biologically active [13].

72 Indeed, this macrolide toxin is responsible for cytotoxic effects, namely, apoptosis and necrosis, in

73 addition to immunosuppressive and analgesic effects [12] after *M. ulcerans* has penetrated breached skin

74 to initiate discrete oedematous lesions that can evolve into typical Buruli ulcer lesions [14]. Currently,

75 the mode of transmission of *M. ulcerans* is debated. While it is clear that *M. ulcerans* must be inoculated

76 through the skin to elicit Buruli ulcer, the specific role of aquatic bugs and mosquitoes as potential

77 vectors is debated along with the possibility of passive entry by any skin breach regardless of its cause. It

78 is not known whether *M. ulcerans* can colonize skin in asymptomatic populations exposed to

79 environments contaminated with *M. ulcerans*. Mycobacteria of the *M. ulcerans* group are known as

80 environmental organisms residing in poorly defined aquatic ecological niches where they could be part

81 of an alimentary chain [15]. We previously reported that *M. ulcerans* could thrive in environmental  
82 niches containing bacteria, fungi, algae and mollusks with which *M. ulcerans* may exchange nutrients  
83 [16]. One may hypothesize that the cutaneous microbiota, which is part of the individual, partially  
84 controls the expression of the *M. ulcerans* infection [17]. Indeed, bacteria and fungi present on skin  
85 contaminated with *M. ulcerans* could interact with the pathogen, as previously shown with the  
86 antagonism between *Staphylococcus lugdunensis* and *Staphylococcus aureus* in the nasal mucosa [18-  
87 19].

88 To contribute to this medical debate, we have undertaken the first study to evaluate the possibility of  
89 asymptomatic carriage of *M. ulcerans* on healthy skin, to characterize the cutaneous bacterial and fungal  
90 microbiota associated with the asymptomatic carriage of *M. ulcerans* and to assess the biological  
91 interactions between *M. ulcerans* and the skin microbiota.

92

## 93 **Methods**

### 94 **Ethics Statement**

95 This study was approved by the Centre MURAZ Ethics Committee, Burkina Faso, and reference  
96 2018- 11/MS/SG/CM/CEI.

97 All adult subjects provided informed oral consent, and a parent or guardian of any child  
98 participant provided informed oral consent on the child's behalf after explaining the merits of the  
99 study. Written consent could not be obtained because the study was conducted among an illiterate  
100 population. The research presents no more than minimal risk of harm to subjects and involves no  
101 procedures for which written consent is normally required outside of the research context (Sec.  
102 56.109 IRB review of research).

103 **Sample collection.** Sampling was performed in two regions of Burkina Faso. Sindou is located in  
104 the rural district of Niofila, Douna Department, Province of Léraba in the Cascades region in the

105 southwest of Burkina Faso near the borders with Côte d'Ivoire and Mali. People sampled in this  
106 region are farmers in frequent contact with stagnant water because of their daily activities in rice,  
107 banana and vegetable cultivation areas that are irrigated from a nearby dam. Cases of Buruli ulcer  
108 have already been reported in this region [20]. Tenkodogo, a town located in the province of  
109 Boulgou and the Central-Eastern region of Burkina Faso, was used as a negative control region  
110 free of Buruli ulcer. Additionally, in this region, farmers working near two dams in rice and  
111 vegetable cultures were swabbed (the lower legs of the farmers were cleaned with water and then  
112 swabbed with sterile swabs (Deltalab, Barcelona, Spain) containing 1 mL of sterile 0.9% sodium  
113 chloride solution, the swabbed parts did not contain any visible lesions.). A total of 104 farmers  
114 were sampled, 52 farmers in each region. In Sindou region, the average age was 37 years, 30  
115 females and 22 males. In Tenkodogo region the male/female ratio was 27/25 respectively with an  
116 average age of 20 years. One sample was taken per individual.

#### 117 **Detection of *M. ulcerans* DNA.**

118 **Real-time PCR amplifications.** Total DNA from the samples and from a six-week-old culture of  
119 *M. ulcerans* CU001 (positive control) was extracted using a QIAamp Tissue Kit by QUIAGEN-  
120 BioRobot EZ1, according to the manufacturer's instructions (Qiagen, Hilden, Germany). To  
121 assess PCR inhibition, 10 µL of an external control was added to 190 µL of sample volume as  
122 previously described [21]. Extracted DNA was used in real-time PCR (RT-PCR) to amplify the  
123 insertion sequences (IS2404 and IS2606) and the ketoreductase-B domain of the mycolactone  
124 polyketide synthase genes (KR-B) [22] using RT-PCR reagents from Roche PCR Kit (Roche  
125 Diagnostics, Meylan, France) and primers and probes as previously described [21] in a CFX 96™  
126 real-time PCR thermocycler and detection system (BIO-Rad, Marnes-la-Coquette, France). To  
127 estimate *M. ulcerans* inoculum in skin swabs, we performed three calibration curves for the  
128 IS2404, IS2606, and KR-B genes. The total DNA of the *M. ulcerans* CU001 strain calibrated at 1

129 McFarland =  $10^6$  CFU was extracted with EZ (Qiagen, Hilden, Germany). Then, 10-fold serial  
130 dilutions of up to  $10^{-8}$  were made to generate a calibration curve for each system. Two reactional  
131 mixes were incorporated into each PCR run as negative controls. Samples were considered  
132 positive when the KR-B gene was detected with Ct < 40 cycles, and at least one of the two PCRs  
133 of the insertion sequence gave Ct < 40 cycles and KR-B was detected with Ct < 40 cycles.

#### 134 **Skin microbiota repertoire.**

135 **Bacterial culture.** All RT-PCR-positive samples collected in Sindou were selected for culture. Six  
136 negative samples collected in the same region were used as negative controls. For each sample, a cascade  
137 dilution (up to  $10^{-10}$ ) was performed in sterile PBS (Thermo Fisher Diagnostics, Dardilly, France), and  
138 100  $\mu$ L of each dilution was inoculated in duplicate on blood agar plates (bioMérieux, Marcy l'Etoile,  
139 France). One blood agar plate was incubated aerobically, and the second was anaerobically incubated at  
140 37°C for 72 hours. After incubation, each colony presenting a unique morphology was sub-cultured onto  
141 a blood agar plate and incubated at 37°C for 48 hours under the appropriate atmosphere to isolate each  
142 colony type.

143 **Fungal culture.** *M. ulcerans* PCR-positive samples were cultured in three different culture media,  
144 namely, homemade RMI medium, Sabouraud agar (Oxoid, Dardilly, France) and Chromagar (Becton  
145 Dickinson, Le Pont de Claix, France) incubated at 30°C for seven days. Each colony was sub-cultured  
146 and incubated under the same conditions. The six PCR-negative samples (negative controls) were treated  
147 using the same protocol.

148 **Matrix assisted laser desorption ionization time-of-flight identification of colonies.** The  
149 identification of the bacterial and fungal colonies was carried out using matrix-assisted laser  
150 desorption ionization time-of-flight mass spectrometry MALDI-TOF-MS as previously described  
151 [23,24]. For bacteria, each colony was deposited in duplicate onto a MALDI-TOF MSP 96 target  
152 plate (Bruker Daltonics, Leipzig, Germany), and 2  $\mu$ L of matrix solution (saturated solution of

153 alpha-cyano-4- hydroxycinnamic acid in 50% acetonitrile and 2.5% trifluoroacetic acid) was  
154 added to each spot and allowed to dry for 5 mins and then analysed by Microflex spectrometer  
155 (Bruker Daltonics) using the software MALDI BioTyper 3.0 (Bruker Daltonics). For the  
156 identification of fungi, each colony was incubated in 1 mL of 70% ethanol for 10 min and then  
157 centrifuged at 1,300 g for 5 min. The pellet was treated with 20  $\mu$ L of acetonitrile and formic acid  
158 (v.v) at 100% and 70%, respectively. This mixture was then centrifuged at 1300 g for 5 min, and  
159 1.5  $\mu$ L of the supernatant was deposited on a MALDI-TOF-MS target and allowed to dry before  
160 1.5  $\mu$ L of matrix was deposited on each spot, allowed to dry for 5 min and then analysed by par  
161 Microflex spectrometer (Bruker Daltonics) using the software MALDI BioTyper 3.0 (Bruker  
162 Daltonics).

163 **Molecular identification and sequencing.** All colonies that remained unidentified by MALDI-TOF-MS  
164 were subjected to molecular identification by sequencing the bacterial 16S rRNA [25] and the fungal  
165 ITS1, ITS2,  $\beta$  tubulin and TEF regions. The primers used in this study are reported in Table S1. DNA  
166 extraction was performed using BioRobot EZ1 (Qiagen, Les Ullis, France) using the commercial EZ1  
167 DNA Tissue Kit according to the manufacturer's instructions (Qiagen). PCR was performed using  
168 Hotstar *Taq* polymerase according to the manufacturer's instructions (Qiagen) using a thermocycler  
169 (Applied Biosystem, Paris, France). PCR products were separated by electrophoresis on a 1.5% agarose  
170 gel and stained with SYBR® safe (Thermo Fisher Scientific) before being visualized under an ultraviolet  
171 transilluminator. PCR products were then purified using a Millipore NucleoFast 96 PCR kit following  
172 the manufacturer's recommendations (Macherey-Nagel, Düren, Germany) and sequenced using the  
173 BigDye Terminator Cycle Sequencing Kit (Applied Biosystems) with an automatic sequencer ABI  
174 (Applied Biosystems). Sequences were assembled using the software ChromasPro 1.7 (Technelysium  
175 Pty Ltd., Tewantin, Australia) and blasted in the NCBI databank (<http://blast.ncbi.nlm.nih.gov/Blast.cgi>)



176 to identify bacterial species and against the Mycobank database <http://www.mycobank.org/> to identify  
177 fungal species.

178 **Fungi-*M. ulcerans* biological interactions.** The three fungal species found to significantly correlate  
179 with the presence / absence of *M. ulcerans* skin carriage (*A. flavus*, *A. niger* and *P. rubens*) were cultured  
180 in the presence / absence of mycolactones AB / C extracted from a culture of *M. ulcerans* CU001 to  
181 observe the effect of mycolactones on spore germination and the fungal network. Briefly, agar plates  
182 were cut into T-shape, the fungal spores were placed on the middle strand, and two virgin absorbent  
183 paper discs were placed on each side of the plates. 20uL of PBS were put on the first disc (negative  
184 control) and 20uL of mycolactones AB / C on the second disc. The chemoattractant effect of  
185 mycolactone AB / C was measured as previously described [25]. On the other hand, fungal spores were  
186 put in Sabouraud liquid medium containing 20uL of mycolactones AB / C or 20uL of PBS as a negative  
187 control. The effect of Mycolactone AB/C on spore germination was then monitored as previously  
188 described [26].

### 189 **Statistical analyses.**

190 The first exploratory step of unsupervised analysis of the cutaneous bacterial and fungal  
191 microbiota used a main component analysis by integrating the presence or absence of each of the  
192 fungi detected in at least one individual and adding the variable "detection of *M. ulcerans* by  
193 PCR". We complemented this analysis with a supervised comparison between individuals  
194 positive and negative for *M. ulcerans* by PCR. To do this, we compared the detection frequency  
195 in the two groups. Statistical significance was calculated by the two-sided exact Fisher's test.  
196 Owing to the possible risk of missing important findings, adjustments for multiple comparisons  
197 were not performed, as suggested for exploratory work [27]. A double-clustering heatmap was  
198 used to visualize the potential clustering of cultured fungal and bacterial repertoires with *M.*  
199 *ulcerans*-positive or negative skin samples. Finally, we carried out a discriminant factor analysis

200 to test whether the fungal skin microbiota discriminated against individuals who were positive or  
201 negative for *M. ulcerans* skin carriage. The principal component and discriminant factor analyses  
202 were performed using XLSTAT v2019.1 statistical and data analysis solution (Long Island, NY,  
203 USA (<https://www.xlstat.com>)). Multivariate analysis was performed via the Genmod procedure  
204 with the SAS 9.4 statistical software using a negative binomial distribution, adjusted for the  
205 effect of time (quantitative variable) and by using generalized estimating equations to account for  
206 the non-independence of repeated measures to analyse the results of germination assays. The  
207 Wilcoxon signed rank test and Chi-squared test were used to compare the attraction effect of  
208 fungi by mycolactones and to compare *M. ulcerans* prevalence in the two geographical regions of  
209 Sindou and Tenkodogo, respectively. Statistical tests were performed on the website biostaTGV,  
210 <https://biostatgv.sentiweb.fr>.

## 211 **Results**

212 ***M. ulcerans* DNA detection.** Negative controls introduced in every batch of real-time PCR remained  
213 negative, and positive controls were positive for all the targeted sequences IS2404, IS2606 and KR-B,  
214 allowing the establishment of calibration curves. Of the 52 swabs collected in the region of Sindou, eight  
215 were positive for IS2404, six were positive for IS2606, two were positive for both IS2404 and IS2606,  
216 one was positive for both IS2404 and KR-B, two were positive for both IS2606 and KR-B, one was  
217 positive for all three targeted sequences and 32 samples were negative (Fig. 1). Therefore, 6/52 (11.5%)  
218 swabs were positive for at least two *M. ulcerans* DNA sequences. As expected, only three samples were  
219 positive for IS2404 only in Tenkodogo, so none of the 52 skin samples collected in this negative control  
220 region were positive for *M. ulcerans*, confirming the probable absence of *M. ulcerans* in this region. The  
221 difference in the prevalence of RT-PCR-based detection of *M. ulcerans* between the two regions was

222 significant ( $P = 0.04$ , N-1 Chi-squared test). Based on the calibration curves established during this  
223 study, the Ct values observed here were extrapolated to 9-50 colony forming units (CFU) of *M. ulcerans*.

224 **Skin microbiota identification.** A total of 84 different species of microorganisms (62 bacterial and 22  
225 fungal species) belonging to 45 different genera were recovered from the twelve samples. Thirty-one  
226 different species of microorganisms (19 bacterial and 12 fungal species) grew exclusively in *M.*  
227 *ulcerans*-PCR positive samples. Thirty-two different species (22 bacterial and 10 fungal species) grew  
228 only from *M. ulcerans*-PCR negative samples. Twenty-one bacterial species grew on both *M. ulcerans*-  
229 PCR positive samples and *M. ulcerans*-PCR negative samples. No fungal species were found in both  
230 types of samples simultaneously (Fig. 2). Globally, the microbiota of *M. ulcerans*-PCR positive samples  
231 was statistically enriched for Actinobacteria (Fisher's test p-value = 0.03). The genus *Aspergillus* and the  
232 species *Aspergillus flavus* were significantly associated with *M. ulcerans*-PCR positive samples (two-  
233 sided Fisher's exact test p-value = 0.0021 and 0.015, respectively), and the genus *Penicillium* was  
234 significantly associated with *M. ulcerans*-PCR negative samples (p-value = 0.0021, Fisher's exact test).

235 All *Zygomycetes*, *Acidovorax*, *Brevundimonas*, *Cutibacterium*, and *Homoserinibacter* species were  
236 recovered from PCR *M. ulcerans*-positive samples, whereas all *Penicillium*, *Cellulosimicrobium*,  
237 *Franconibacter*, *Ochrobactrum*, *Porphyromonas*, *Roseomonas*, *Achromobacter* and *Lelliottia* species  
238 were recovered from *M. ulcerans*-PCR-negative samples, but these associations were not statistically  
239 significant (Fig. 2). The dendrogram obtained by the agglomerative hierarchical classification of the  
240 species recovered from samples harboured two distinct clusters perfectly separating the *M. ulcerans*-  
241 PCR positive samples from the *M. ulcerans*-PCR negative samples (Fig. 3). These results highly suggest  
242 that the skin microbiota was significantly correlated with *M. ulcerans* carriage.

243 **Principal component analysis.** After submission of the results of fungal and bacterial  
244 culturomics and PCR *M. ulcerans* to PCA analysis, two varifactors (F1 and F7; representing both  
245 a total of 28.3% of the variance of the data) were selected because these two varifactors

246 represented the highest variance of the variable “PCR *M. ulcerans*”. F1 and F7 contributed 20.4%  
247 and 7.9% of the overall variability, respectively. *Aspergillus flavus*, *Propionimicrobium*  
248 *lymphophilum* and *Propionimicrobium freudenreichii* were strongly associated with a positive  
249 PCR for *M. ulcerans*, whereas *Penicillium rubens*, *Penicillium chrysogenum* and *Lelliota*  
250 *nimipressuralis* were associated with a negative PCR. Surprisingly, detection of *Aspergillus* fungi  
251 positively correlated with PCR detection of *M. ulcerans*. Indeed, *A. flavus* was the fungus  
252 exhibiting the strongest positive association with *M. ulcerans*. On the other hand, and  
253 unexpectedly, we observed that the detection of *Penicillium* fungi was anti-correlated with the  
254 detection of *M. ulcerans*. No *Penicillium* detection positively correlated with *M. ulcerans*  
255 detection, while *P. rubens* and *P. chrysogenum* were the only fungi to anti-correlate with *M.*  
256 *ulcerans* (Fig. 4).

257 **Factor discriminant analysis.** Interestingly, factor discriminant analysis identified five fungal  
258 and bacterial species that significantly discriminated *M. ulcerans*-PCR positive and negative  
259 samples, including *A. flavus*, *Brevundimonas diminuta*, *Propionimicrobium lymphophilum*,  
260 *Pantoea dispersa* and *P. rubens* (p-values: 0.001, 0.01, 0,049, 0.049, 0.049, respectively –Table  
261 S2). The discriminant analysis showed that the cutaneous fungal and bacterial microbiota  
262 discriminated with 100% accuracy between *M. ulcerans* positive and negative groups (receiver  
263 operator curve analysis: area under curve = 1 - no error in the confusion matrix – perfect  
264 clustering).

265 **Fungi-*M. ulcerans* biological interactions.** Mycolactones significantly increased spore germination of  
266 *A. flavus* after a 10-hour incubation (stimulated 91.2% vs. control 28.75%; P <.0001), significantly  
267 increased spore germination of *A. niger* (stimulated 75.42% vs. control 69.17%; P <.0001), and  
268 significantly decreased spore germination of *P. rubens* (stimulated 45.2% vs. control 50.7%; P <.0001)

269 (Fig. 5). Moreover, we observed that mycolactones significantly attracted *A. flavus* and *A. niger* during  
270 the T-test assay ( $P$ -value: 0.013 and 0.003, respectively) (Fig. 6).

271

## 272 **DISCUSSION**

273 Using a standard RT-PCR assay to detect the asymptomatic skin carriage of *M. ulcerans* in skin samples  
274 collected from individuals living in Burkina Faso, we detected a prevalence of 11.5% of *M. ulcerans*  
275 carriage in individuals residing in the Sindou region, Burkina Faso, where Buruli ulcer cases have been  
276 previously reported [20]. Our data agree with a previous report of cutaneous carriage of *M. ulcerans* in  
277 Ghana among people practising agriculture without any protective clothing and in infants crawling on  
278 the soil [28]. Thus, the data reported here confirm that in Buruli ulcer-endemic areas, some people are  
279 asymptomatic skin carriers of *M. ulcerans*. The *M. ulcerans* inoculum we detected on the skin has been  
280 reported to be sufficient to initiate Buruli ulcer lesions in a murine model [29]. These observations  
281 suggest that asymptomatic skin carriage could be a previously undescribed condition in the natural  
282 history of Buruli ulcer.

283 Exploration of the skin microbiota at the interface of healthy and diseased skin is in its infancy,  
284 especially regarding Buruli ulcer [30]. Comparison of skin microbiota between *M. ulcerans*-PCR  
285 positive and negative samples revealed a specific cutaneous microbiota associated with asymptomatic *M.*  
286 *ulcerans* skin carriage, even predicting *M. ulcerans* skin carriage. Other skin pathogens and diseases  
287 (leprosy and psoriasis) have been previously related to a specific skin microbiota [31-32]. The novelty in  
288 our study was to find significant, antiparallel associations between *M. ulcerans* and fungi: *M. ulcerans*  
289 was detected on the skin along with *Aspergillus*, in which spore germination and the fungal network  
290 were stimulated by mycolactones, whereas the detection of *M. ulcerans* has never been associated with  
291 the the presence of *Penicillium* species in the skin, Accordingly, spore germination of *P. rubens* was  
292 inhibited by mycolactones. Therefore, our clinical observations were not fortuitous but revealed

293 transkingdom mycobacteria-fungi interactions, supporting preliminary observations made with the  
294 Zygomycete *Mucor circinelloides* [26]. Of note, the transkingdom communication concerned *P. rubens*,  
295 a penicillin-producing strain, alias *P. chrysogenum*, made famous by Sir Alexandre Fleming [33].

296 All these observations suggest for the first time that transkingdom communications between fungi  
297 and mycobacteria are of medical interest, partially driving the natural history of Buruli ulcer. These  
298 observations will stimulate additional studies to disclose whether this holds true for other mycobacterial  
299 infections of medical interest.

300

301       **REFERENCES**

- 302       1. MacCallum P, Tolhurst JC, Buckle G, Sissons HA. A new mycobac-  
303       man. J Pathol Bacteriol. 1948; 60:93-102. <https://doi.org/10.1002/path.1700600111>.
- 304       2. Johnson PD, Stinear T, Small PL, Pluschke G, Merritt RW, Portaels F, et al. Buruli ulcer  
305       (*M. ulcerans* infection): new insights, new hope for disease control. PLoS Medicine 2005;  
306       2:e108.
- 307       3. Brou T, Broutin H, Elguero E, Asse H, Guegan JF. Landscape diversity related to Buruli  
308       ulcer disease in Cote d'Ivoire. PLoS Negl Trop Dis. 2008; 2:e271.
- 309       4. George KM, Chatterjee D, Gunawardana G, Welty D, Hayman J, Lee R, et al.  
310       Mycolactone: a polyketide toxin from *Mycobacterium ulcerans* required for virulence.  
311       Science 1999; 283:854-7.
- 312       5. Stinear TP, Mve-Obiang A, Small PL, Frigui W, Pryor MJ, Brosch R, et al. Giant  
313       plasmid-encoded polyketide synthases produce the macrolide toxin of *Mycobacterium*  
314       *ulcerans*. Proc Natl Acad Sci USA 2004; 101:1345-49.
- 315       6. Stinear TP, Seemann T, Pidot S, Frigui W, Reysset G, Garnier T, et al. Reductive  
316       evolution and niche adaptation inferred from the genome of *Mycobacterium ulcerans*, the  
317       causative agent of Buruli ulcer. Genome Res. 2007; 17:192-200.
- 318       7. Pidot SJ, Asiedu K, Käser M, Fyfe JA, Stinear TP. *Mycobacterium ulcerans* and other  
319       mycolactone-producing mycobacteria should be considered a single species. PLoS Negle  
320       Trop Dis. 2010; 7:e663.

- 321 8. Yoshida M, Nakanaga K, Ogura Y, Toyoda A, Ooka T, Kazumi Y. Complete Genome  
322 Sequence of *Mycobacterium ulcerans* subsp. *shinshuense*. *Genome Announc.* 2016;  
323 4:1050-16.
- 324 9. Doig KD, Holt KE, Fyfe JA, Lavender CJ, Eddyani M, Portaels F, et al. On the origin of  
325 *Mycobacterium ulcerans*, the causative agent of Buruli ulcer. *BMC Genomics.* 2012;  
326 13:258.
- 327 10. Ucko M, Colorni A, Kvitt H, Diamant A, Zlotkin A, Knibb WR. Strain variation in  
328 *Mycobacterium marinum* fish isolates. *Appl Environ Microbiol.* 2002; 68:5281-7.
- 329 11. Stragier P, Hermans K, Stinear T, Portaels F. First report of a mycolactone-producing  
330 *Mycobacterium* infection in fish agriculture in Belgium. *FEMS Microbiol Lett.* 2008;  
331 286:93-5.
- 332 12. Gehringer M, Altmann KH. The chemistry and biology of mycolactones. *Beilstein J Org*  
333 *Chem.* 2017; 13:1596-660.
- 334 13. Mve-Obiang A, Lee RE, Portaels F, Small PL. Heterogeneity of mycolactones produced  
335 by clinical isolates of *Mycobacterium ulcerans*: implications for virulence. *Immun Infect.*  
336 2003; 71:774-83.
- 337 14. George KM, Pascopella L, Welty DM, Small PL. A *Mycobacterium ulcerans* toxin,  
338 mycolactone, causes apoptosis in guinea pig ulcers and tissue culture cells. *Infect Immun.*  
339 2000; 68:877-83.
- 340 15. Morris A L, Guégan JF, Andreou D, Marsollier L, Carolan K, Le Croller M, et al.  
341 Deforestation-driven food-web collapse linked to emerging tropical infectious disease,  
342 *Mycobacterium ulcerans*. *Sci Adv.* 2016; 2:1600387.



- 343 16. Zingue D, Bouam A, Tian RBD, Drancourt M. Buruli ulcer, a prototype for ecosystem-  
344 related infection, caused by *Mycobacterium ulcerans*. Clin Microbiol Rev. 2018; 31:45-  
345 17.
- 346 17. Van Leuvenhaege C, Vandelannoote K, Affolabi D, Portaels F, Sopoh G, de Jong BC, et al.  
347 Bacterial diversity in Buruli ulcer skin lesions: Challenges in the clinical microbiome analysis of  
348 a skin disease. PloS One 2017; 12:0181994.
- 349 18. Lina G, Boutite F, Tristan A, Bes M, Etienne J, Vandenesch F. Bacterial competition for human  
350 nasal cavity colonization: role of staphylococcal *agr* alleles. Appl Environ Microbiol. 2003;  
351 69:18-23.
- 352 19. Amisshah NA, Glasner C, Ablordey A, Tetteh CS, Kotey NK, Prah I, et al. Genetic  
353 diversity of *Staphylococcus aureus* in Buruli ulcer. PLoS Negl Trop Dis. 2015; 9:3421.
- 354 20. Ouoba K, Sano D, Traoré A, Ouédraogo R, Sakandé B, Sanou A. Buruli ulcers in Burkina  
355 Faso: apropos of 6 cases. Tunis Med. 1998; 76:46-50.
- 356 21. Ninove L, Nougairède A, Gazin C, Thirion L, Delogu I, Zandotti C, et al. RNA and DNA  
357 bacteriophages as molecular diagnosis controls in clinical virology: a comprehensive  
358 study of more than 45,000 routine PCR tests. PloS One 2011; 6:16142.
- 359 22. Fyfe JA, Lavender CJ, Johnson PD, Globan M, Sievers A, Azuolas J, et al. Development  
360 and application of two multiplex real-time PCR assays for the detection of  
361 *Mycobacterium ulcerans* in clinical and environmental samples. Appl Environ Microbiol.  
362 2007; 73:4733-40.
- 363 23. Seng P, Rolain JM, Fournier PE, La Scola B, Drancourt M, Raoult D. MALDI-TOF-mass  
364 spectrometry applications in clinical microbiology. Future Microbiol. 2010; 5:1733-54.

- 365 24. Cassagne C, Normand AC, L'ollivier C, Ranque S, Piarroux R. Performance of MALDI-  
366 TOF MS platforms for fungal identification. *Mycoses* 2016; 59:678-90.
- 367 25. Drancourt M. Outils moléculaires d'identification en bactériologie. *Med Mal Infect.* 1998;  
368 28:380-2.
- 369 26. Hammoudi N, Cassagne C, Armstrong N, Ranque S, Henrissat B, Drancourt M et al.  
370 *Mycobacterium ulcerans* mycolactones-fungi crosstalk. *Sci Rep.* 2019; 9:3028.
- 371 27. Rothman, Kenneth J. No adjustments are needed for multiple comparisons. *Epidemiology*  
372 1990; 43-46.
- 373 28. Prah I. Examination of human skin surfaces for the detection of *Mycobacterium ulcerans*.  
374 M.Sc. Thesis. University of Ghana. 2015. Available from:  
375 <http://ugspace.ug.edu.gh/handle/123456789/8369>
- 376 29. Wallace JR, Mangas KM, Porter JL, Marcsisin R, Pidot SJ, Howden B et al.  
377 *Mycobacterium ulcerans* low infectious dose and mechanical transmission support insect  
378 bites and puncturing injuries in the spread of Buruli ulcer. *PLoS Negl Trop Dis.* 2017;  
379 11:5553.
- 380 30. Cho I, Blaser M J. The human microbiome at the interface of health and disease. *Nat Rev*  
381 *Genet.* 2012; 13:260-70.
- 382 31. Silva PE, Reis MP, Ávila MP, Dias MF, Costa PS, Suhadolnik MLS, et al. Insights into  
383 the skin microbiome dynamics of leprosy patients during multi-drug therapy and in  
384 healthy individuals from Brazil. *Sci Rep.* 2018; 8:8783.
- 385 32. Fahlén A, Engstrand L, Baker BS, Powles A, Fry L. Comparison of bacterial microbiota  
386 in skin biopsies from normal and psoriatic skin. *Arch Dermatol Res.* 2012; 304:15-22.

387 33. Houbraken J, Frisvad JC, Samson RA. Fleming's penicillin producing strain is not

388 *Penicillium chrysogenum* but *P. rubens*. IMA Fungus 2011; 2:87-95.

389

390        **ACKNOWLEDGEMENTS**

391        The authors acknowledge the technical help of Nicholas Armstrong.

392        This work was supported by the French Government under the « Investissements d’avenir »

393        (Investments for the Future) programme managed by the Agence Nationale de la Recherche

394        (ANR, fr: National Agency for Research), (reference: Méditerranée Infection 10-IAHU-03). This

395        work was supported by Région Sud (Provence Alpes Côte d’Azur) and European funding

396        FEDER PRIMMI.

397

398 **FIGURE LEGENDS**

399 Fig. 1: Real-time PCR detection of *M. ulcerans* from 52 swabs collected in the Sindou region,  
400 IS2404 and IS2606 are specific insertion sequences for *M. ulcerans* KR-B ketoreductase-B gene.

401 Fig. 2: The different microorganisms grown from 12 skin samples comprising 6 *M. ulcerans*  
402 positive samples and 6 negative samples are presented with their relative frequency differences  
403 and associated P-values. A total of 84 species distributed among 62 bacteria and 22 fungi were  
404 cultured.

405 Fig. 3: The agglomerative hierarchical classification dendrogram of individuals according to their  
406 cutaneous microbiota associated with the detection (P1 to P6) or absence (N1 to N6) of *M.*  
407 *ulcerans*. *M. ulcerans* PCR-negative samples and *M. ulcerans* PCR-positive samples were clearly  
408 separated into two distinct clusters according to the composition of the skin microbiota.

409 Fig. 4: PCA of 84 bacterial and fungal species isolated from individuals in Burkina Faso revealed  
410 a strong association of *A. flavus*, *P. lymphophilum* and *P. freudenreichii* with *M. ulcerans* skin  
411 carriage.

412 Fig. 5: Mycolactone-induced spore germination of *A. flavus*, *A. niger* and *P. rubens* in the  
413 presence of PBS as a negative control.

414 Fig. 6: Fungi attraction test: mycolactones (right side disk) attract *A. flavus* and *A. niger* in the  
415 presence of PBS as a negative control (left side disk).

416 **Supplementary data**

417 Supplementary Table 1: Primers used in this study for the PCR-based identification of fungi and  
418 bacteria.

|                        | <b>Name</b> | <b>Sequences 5'-3'</b>       |
|------------------------|-------------|------------------------------|
| Fungal<br>sequences    | ITS3        | GCATCGATGAAGAACGCAGC         |
|                        | ITS4        | TCCTCCGCTTATTGATATGC         |
|                        | Bt2a        | GGTAACCAAATCGGTGCTGCTTTC     |
|                        | Bt2b        | ACCCTCAGTGTAGTGACCCTTGGC     |
|                        | AI33F       | GAYTTCATCAAGAACATGAT         |
|                        | AI33R       | GACGTTGAADCCRACRTTGTC        |
|                        | AI34F       | TTCATCAAGAACATGAT            |
|                        | AI34R       | GCTATCATCACAATGGACGTTCTTGGAG |
|                        | ITS1        | TCCGTAGGTGAACCTGCGG          |
|                        | ITS2        | GCTGCGTTCATCGATGC            |
| Bacterial<br>sequences | FD1         | AGAGTTTGATCCTGGCTCAG         |
|                        | rP2         | ACGGCTACCTTGTTACGACTT        |
|                        | 536F        | CAGCAGCCGCGGTAATAC           |
|                        | 536R        | GTATTACCGCGGCTGCTG           |
|                        | 800F        | ATTAGATACCCTGGTAG            |
|                        | 800R        | CTACCAGGGTATCTAAT            |
|                        | 1050F       | TGTCGTCAGCTCGTG              |
|                        | 1050R       | CACGAGCTGACGACA              |

419

420

421 Supplementary Table 2: Factor discriminant analysis (FDA) revealed five fungal and bacterial  
422 species that significantly discriminated *M. ulcerans*-PCR positive and negative samples.

423

| Variable                                 | Lambda | F      | DDL1 | DDL2 | p-value |
|------------------------------------------|--------|--------|------|------|---------|
| <i>Propionimicrobium lymphophilum</i> -0 | 0,667  | 5,000  | 1    | 10   | 0,049   |
| <i>Brevundimonas diminuta</i> -0         | 0,500  | 10,000 | 1    | 10   | 0,010   |
| <i>Pantoea dispersa</i> -0               | 0,667  | 5,000  | 1    | 10   | 0,049   |
| <i>Penicillium rubens</i> -0             | 0,667  | 5,000  | 1    | 10   | 0,049   |
| <i>Aspergillus flavus</i> -0             | 0,286  | 25,000 | 1    | 10   | 0,001   |

424

425

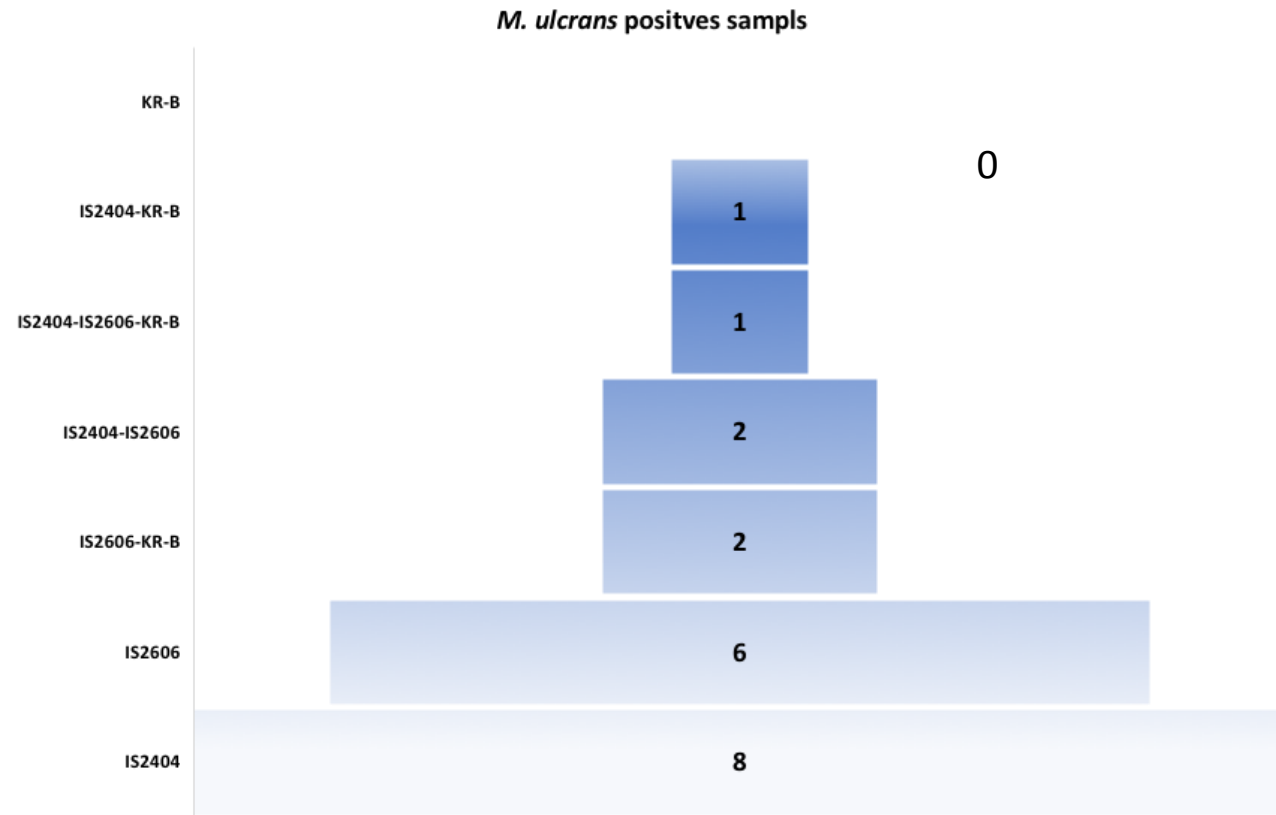

Fig. 1.



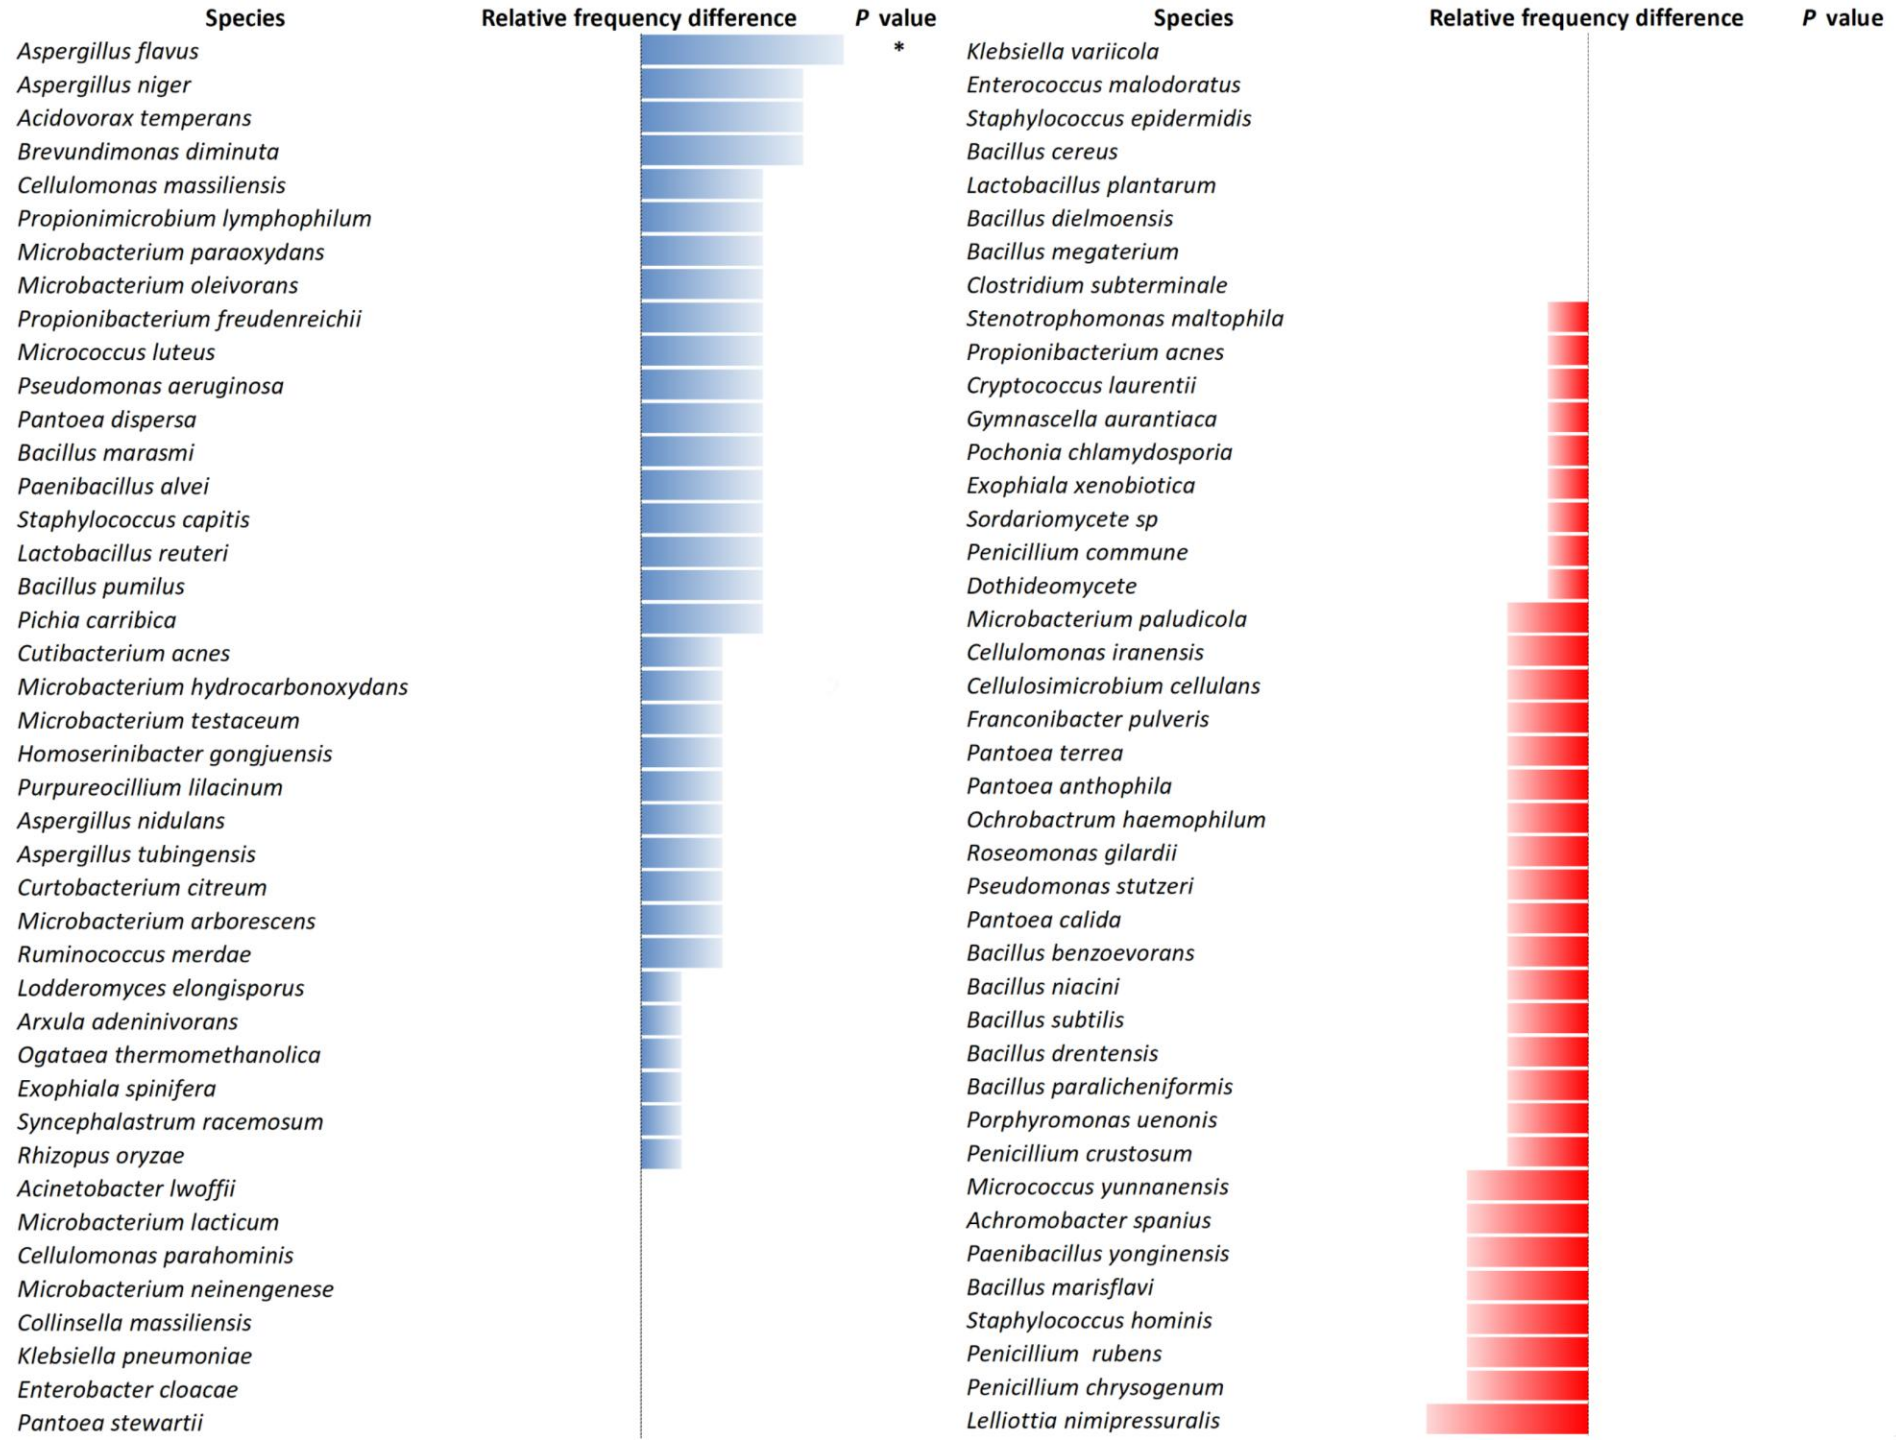

Fig. 2.

# Dendrogram

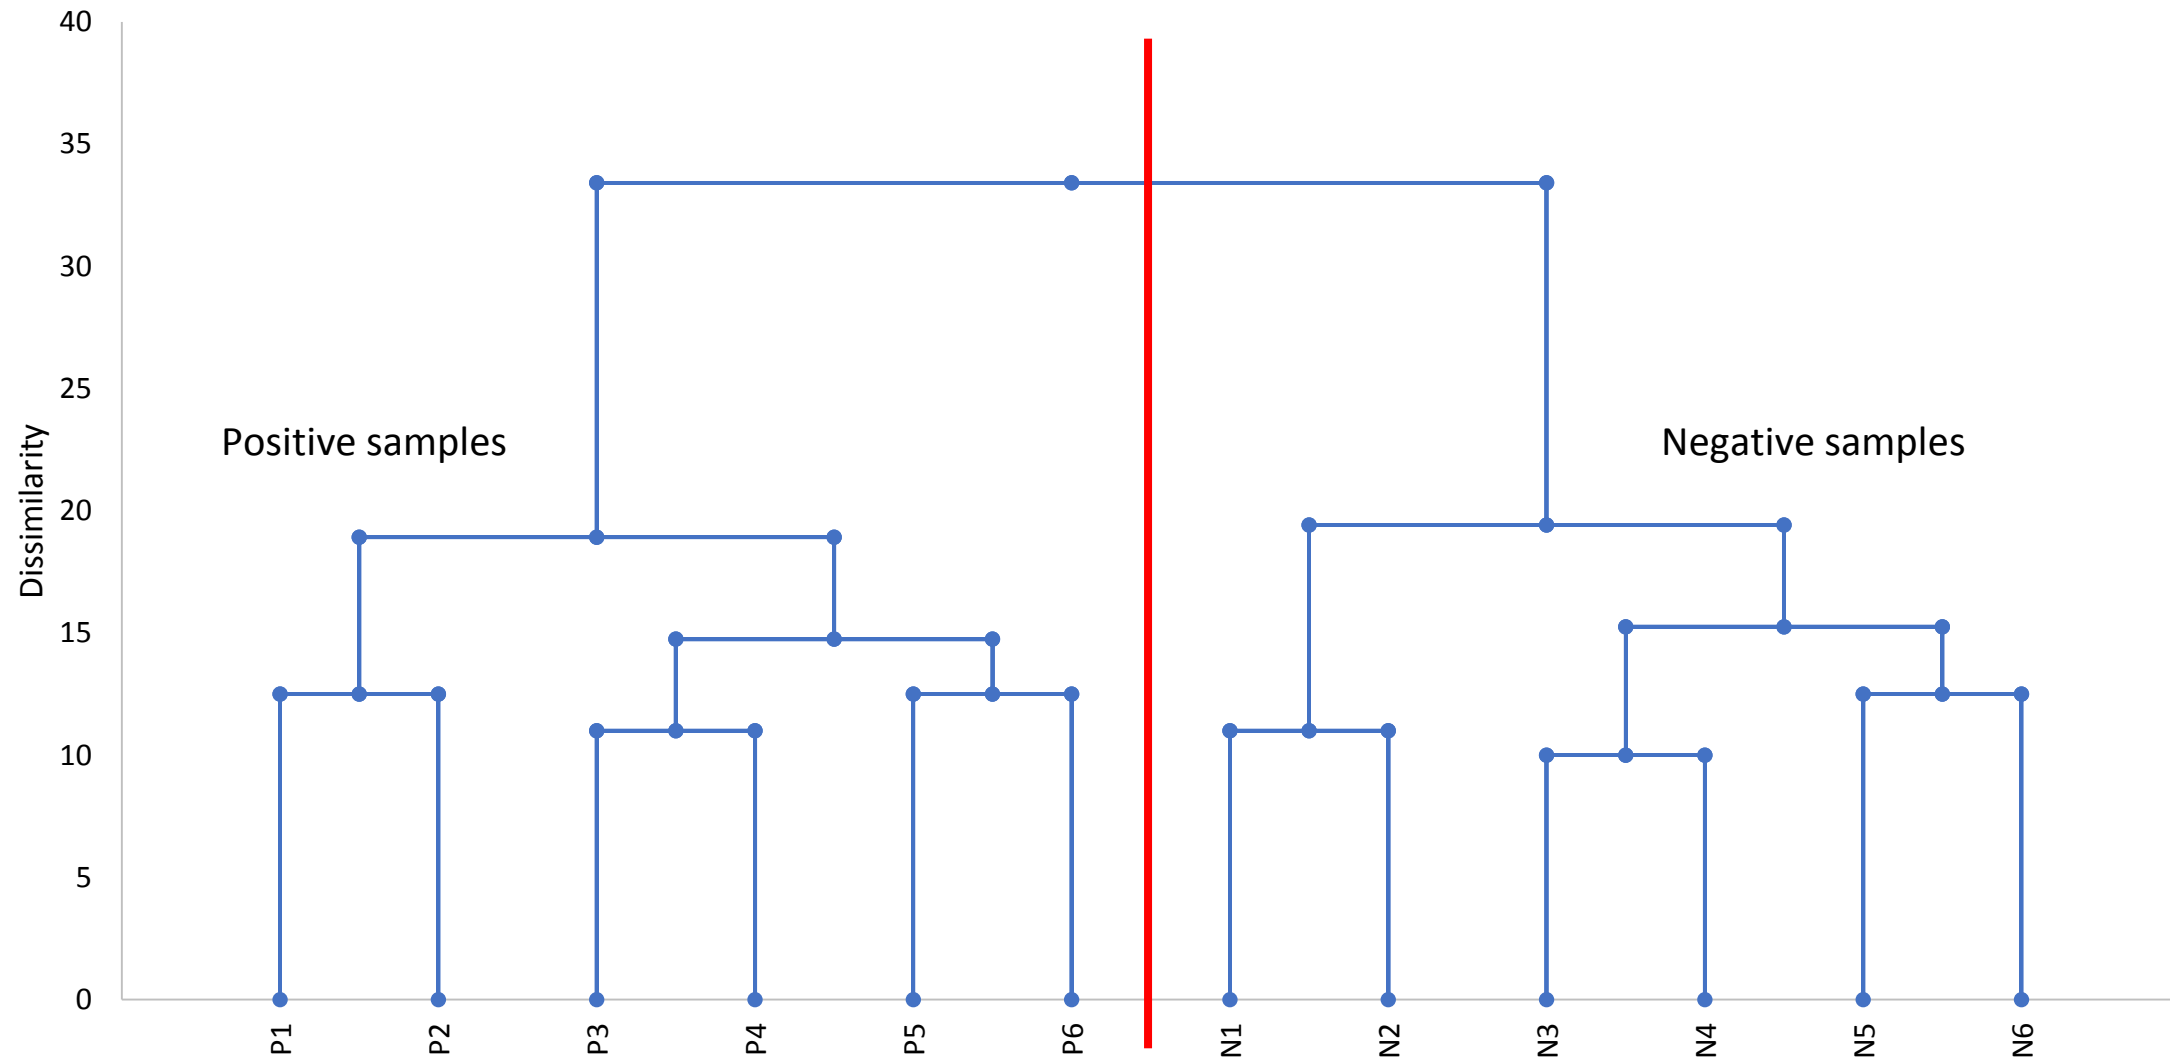

Fig. 3.

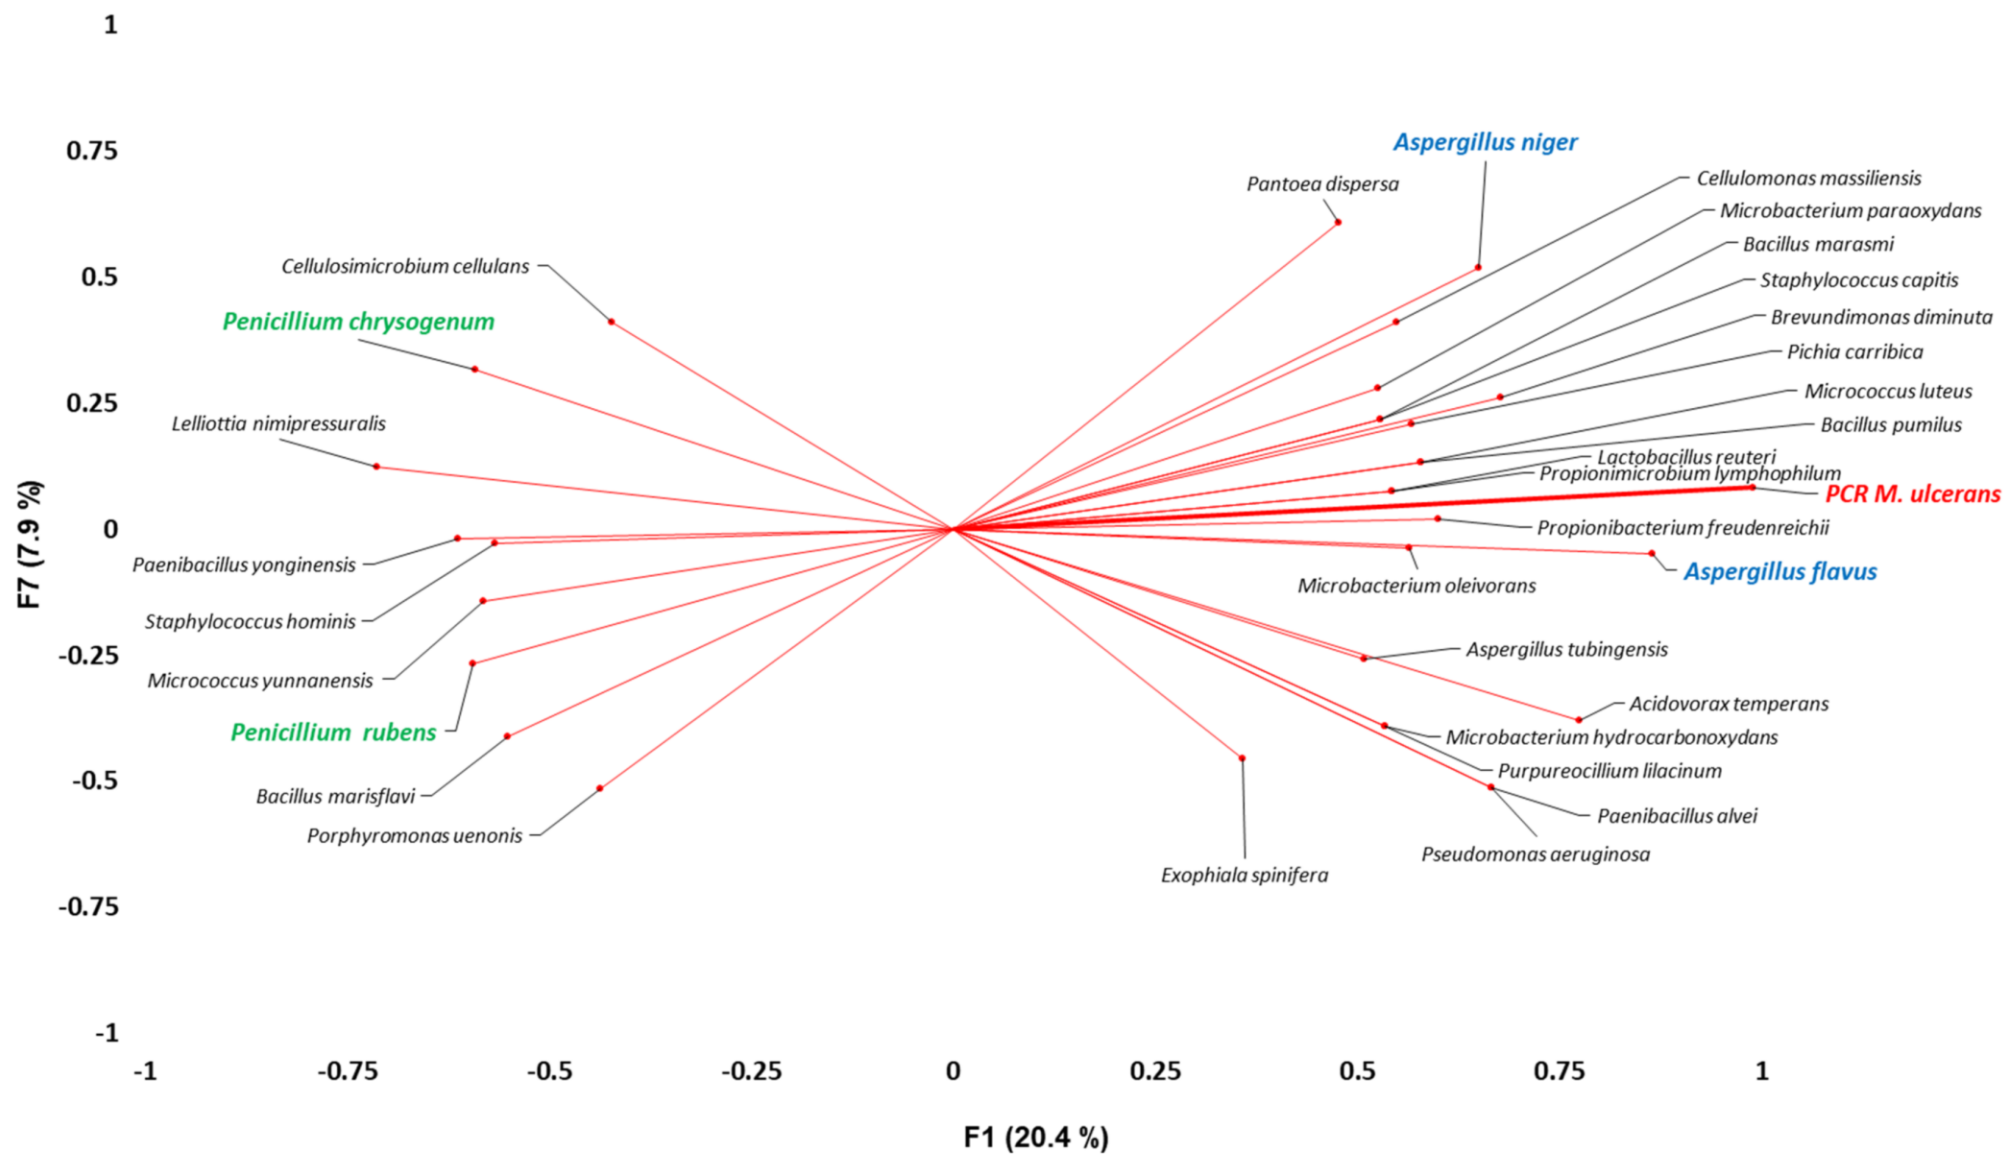

Fig. 4.

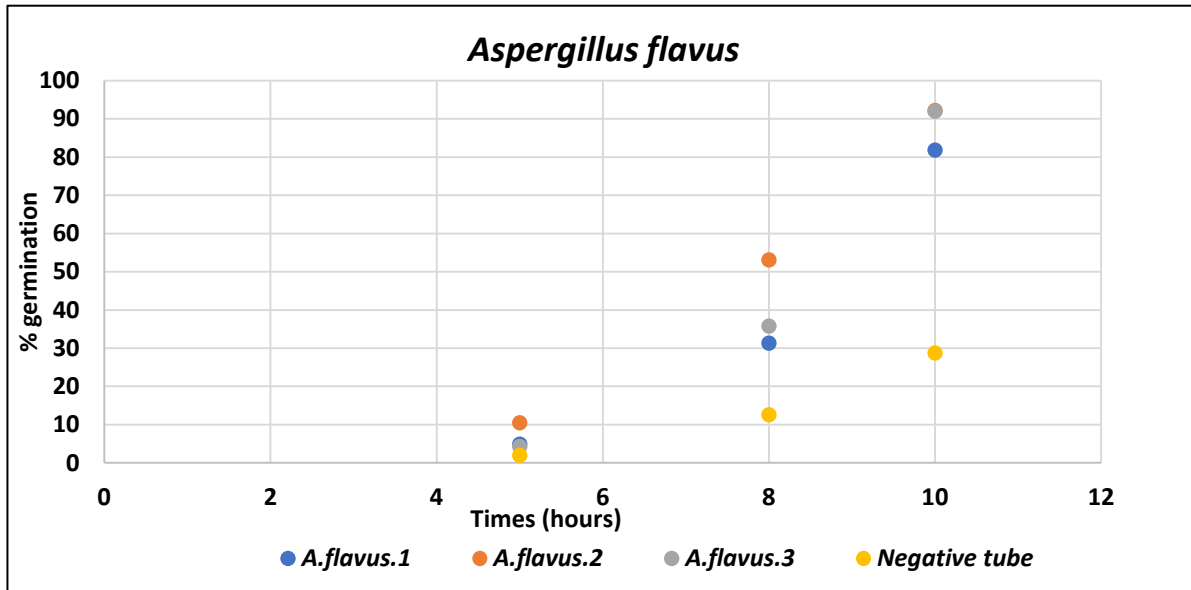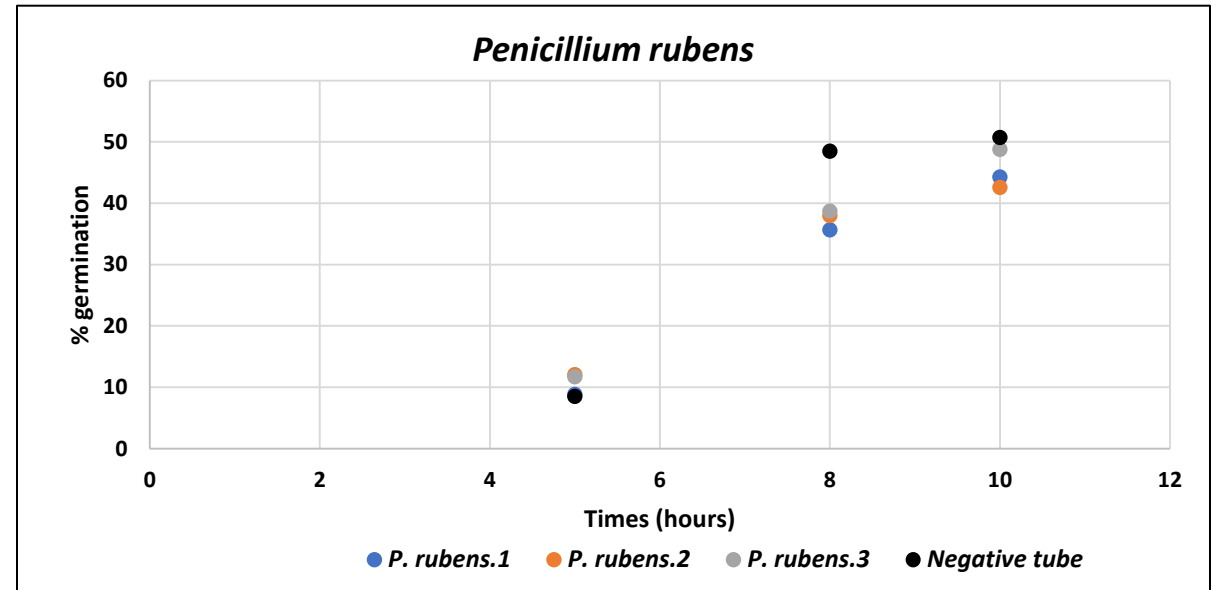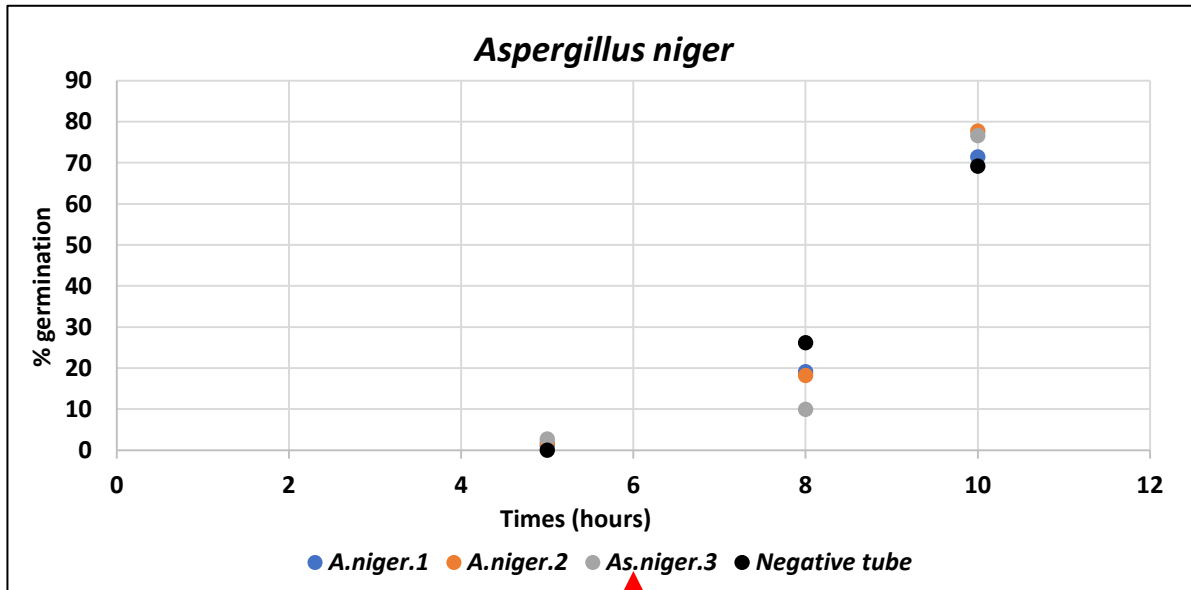

Fig. 5.

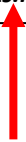

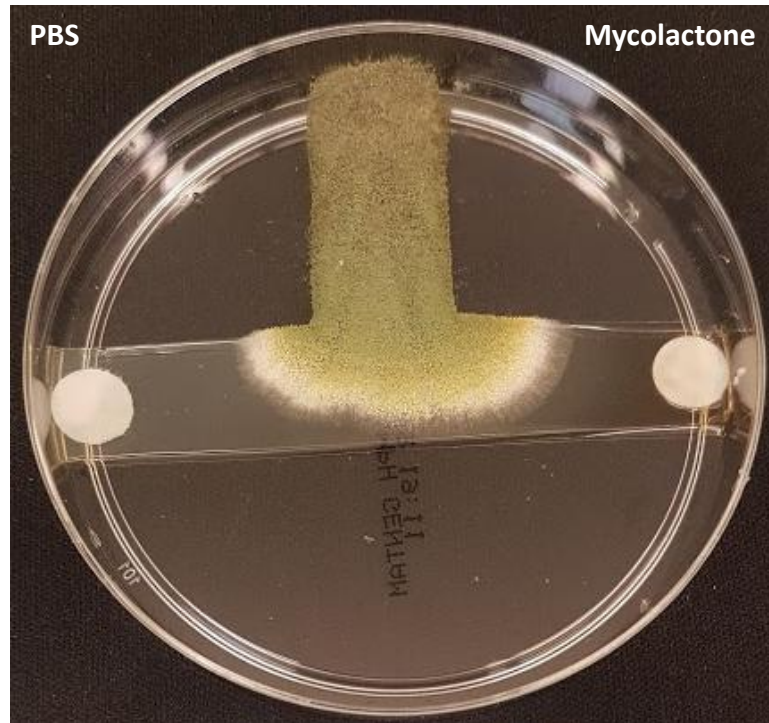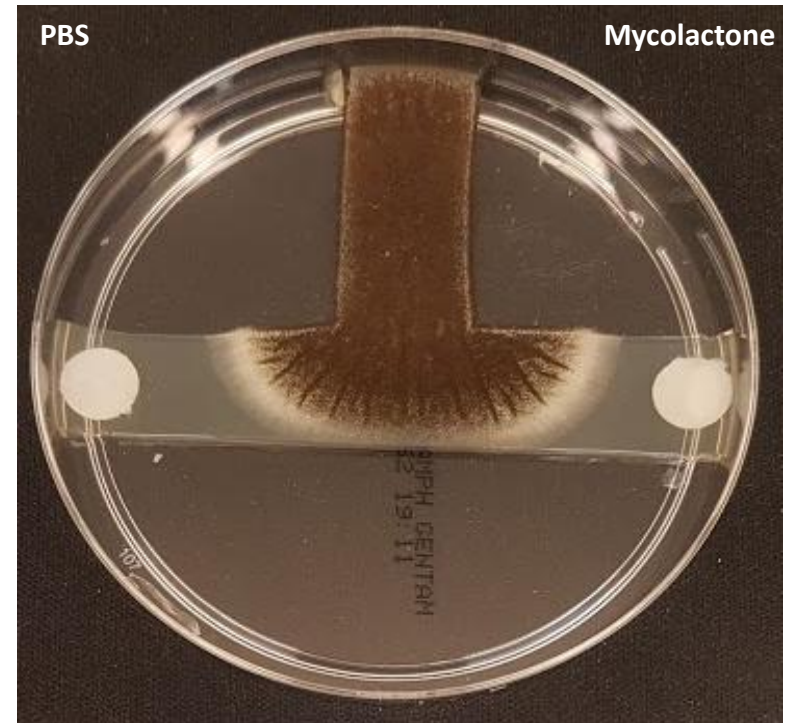

Fig. 6.
